1 **Comparison of machine learning to deep learning for automated annotation of Gleason**  
2 **patterns in whole mount prostate cancer histology.**

3  
4 Savannah R. Duenweg<sup>1</sup>, Michael Brehler<sup>2</sup>, Samuel A. Bobholz<sup>1</sup>, Allison K. Lowman<sup>2</sup>, Aleksandra  
5 Winiarz<sup>1</sup>, Fitzgerald Kyereme<sup>2</sup>, Andrew Nencka<sup>2</sup>, Kenneth A. Iczkowski<sup>3</sup>, and Peter S.  
6 LaViolette<sup>2,4</sup>

7  
8 Departments of <sup>1</sup>Biophysics, <sup>2</sup>Radiology, <sup>3</sup>Pathology, and <sup>4</sup>Biomedical Engineering, Medical  
9 College of Wisconsin, Milwaukee, WI 53226, USA

10  
11 Running Title: Automated Gleason pattern annotations

12  
13 Corresponding Author

14  
15 Peter S. LaViolette, PhD  
16 Associate Professor of Radiology and Biomedical Engineering  
17 Medical College of Wisconsin  
18 8701 Watertown Plank Rd.  
19 Milwaukee, WI 53226  
20 (414) 955-7490  
21 [plaviole@mcw.edu](mailto:plaviole@mcw.edu)

22  
23

24 **Abstract**

25 **Background.** One in eight men will be affected by prostate cancer (PCa) in their lives. While the  
26 current clinical standard prognostic marker for PCa is the Gleason score, it is subject to inter-  
27 reviewer variability. This study compares two machine learning methods for discriminating  
28 between high- and low-grade PCa on histology from 47 PCa patients.

29 **Methods.** Digitized slides were annotated by a GU fellowship-trained pathologist. High-resolution  
30 tiles were extracted from annotated and unlabeled tissue. Glands were segmented and pathomic  
31 features were calculated and averaged across each patient. Patients were separated into a training  
32 set of 31 patients (Cohort A, n=9345 tiles) and a testing cohort of 16 patients (Cohort B, n=4375  
33 tiles). Tiles from Cohort A were used to train a compact classification ensemble model and a  
34 ResNet model to discriminate tumor and were compared to pathologist annotations.

35 **Results.** The ensemble and ResNet models had overall accuracies of 89% and 88%, respectively.  
36 The ResNet model was additionally able to differentiate Gleason patterns on data from Cohort B  
37 while the ensemble model was not.

38 **Conclusions.** Our results suggest that quantitative pathomic features calculated from PCa  
39 histology can distinguish regions of cancer; how-ever, texture features captured by deep learning  
40 frameworks better differentiate unique Gleason patterns.

41

## 42 **Introduction**

43 Prostate cancer (PCa) is the most diagnosed non-cutaneous cancer in men, affecting an estimated  
44 268,000 men in 2022[1]. Improved prostate cancer screening and therapies have led to a high five-  
45 year survival rate and the overall prognosis for PCa is one of the best compared amongst all  
46 cancers. Prostate cancer is currently graded using the Gleason grading system, assigning scores  
47 corresponding to the two most predominant morphological patterns present. More recently, it has  
48 been used to assign patients into one of five Grade Groups (GG) to predict prognosis[2]. Clinically  
49 significant cancer ( $GG \geq 2$ , tumor volume  $\geq 0.5$  mL, or stage  $\geq T3$ ) is often treated with radiation  
50 therapy and/or radical prostatectomy. Low-grade cancer can often be monitored through annual  
51 prostate specific antigen (PSA) testing. Side effects from prostate cancer treatment can include  
52 long-term complications such as impotence and impaired urinary function[3], thus early and  
53 accurate detection of PCa is necessary to minimize overtreatment while still addressing clinically  
54 significant cancer.

55  
56 Digital pathology is playing an increasingly important role in clinical research, with applications  
57 in diagnosis and treatment decision support[4]. Fast acquisition time, management of data, and  
58 interpretation of histology has made digital pathology popular and easier for pathologists to  
59 manage and share slides. Additionally, artificial intelligence (AI) with digital pathology has  
60 created opportunities to incorporate computational algorithms into pathology workflows or for AI-  
61 based computer-aided diagnostics[5].

62  
63 In prostate cancer research, many machine learning applications have been focused on automated  
64 Gleason grading. While the Gleason score is currently the gold standard prognostic marker for

65 prostate cancer, the process of assigning grades is a subjective, quantitative metric. Additionally,  
66 pathologist-provided annotations for digital pathology studies is not only time consuming, but can  
67 result in significant inter-observer variability[6, 7]. The primary focus of these automated Gleason  
68 grading methods has been on biopsies or tissue microarrays as opposed to whole-slide images[8-  
69 11]. A fast, automated tool for identifying Gleason patterns in prostate histology could allow for  
70 rapid annotation and grading, as well as provide important prognostic information such as  
71 recurrence probabilities.

72  
73 In this study, we developed an Automated Tumor Assessment of pRostate cancer hIstology  
74 (ATARI) classification model for the Gleason grading of whole-mount prostate histology using  
75 quantitative histomorphometric features calculated from digitized prostate cancer slides. The  
76 results of this model were validated using ground truth pathologist annotations. In addition, we  
77 compared this model to a residual network with 101 layers (ResNet101) for automated Gleason  
78 grading[12]. Specifically, we tested the hypothesis that a machine learning model applied to  
79 second-order features calculated from digitized histology could discriminate prostate cancer from  
80 normal tissue. We also hypothesized that deep learning model would differ in classification  
81 accuracy, both in detecting cancer and differentiating Gleason patterns.

82

## 83 **Materials and Methods**

### 84 *Patient Population and Data Acquisition*

85 Data from 47 prospectively recruited patients (mean age 59 years) with pathologically confirmed  
86 prostate cancer were analyzed for this study. This study was conducted according to the guidelines  
87 of the Declaration of Helsinki and approved by the Institutional Review Board of the Medical

88 College of Wisconsin. Written informed consent was obtained from all subjects involved in the  
89 study. The data presented in this study are available on request from the corresponding author. The  
90 data are not publicly available due to patient privacy concerns. For model development, subjects  
91 were split into 2/3 training (n = 31 patients) and 1/3 testing (n = 16 patients) data sets, matched for  
92 tumor grade and other clinical characteristics (see **Table 1**).

93

94

95 **Table 1:** Patient demographics of the study cohort at the time of radical prostatectomy (RP).

|                                    | <b>Training</b> | <b>Testing</b> |
|------------------------------------|-----------------|----------------|
|                                    | (n = 31)        | (n = 16)       |
| Age at RP, years (mean, SD)        | 59 (6.8)        | 59 (4.9)       |
| Preoperative PSA, ng/mL (mean, SD) | 7.9 (6.2)       | 7.7 (4.5)      |
| Grade group at RP (n, %) (n = 72)  |                 |                |
| 6                                  | 8 (26)          | 2 (12)         |
| 3+4                                | 13 (41)         | 7 (44)         |
| 4+3                                | 4 (13)          | 3 (19)         |
| 8                                  | 3 (10)          | 1 (6)          |
| ≥ 9                                | 3 (10)          | 3 (19)         |

96

### 97 *Tissue Collection and Processing*

98 Prostatectomy was performed using a da Vinci robotic system (Intuitive Surgical, Sunnyvale,  
99 CA)[13, 14]. Whole prostate samples were fixed in formalin overnight and sectioned using custom  
100 axially oriented slicing jigs[15]. Briefly, prostate masks were manually segmented from the

101 patient's pre-surgical T2-weighted magnetic resonance image using AFNI (v.19.1.00) (Analysis  
102 of Functional NeuroImages, <http://afni.nimh.nih.gov/>)[16]. Patient-specific slicing jigs were  
103 modeled using Blender 2.79b (<https://www.blender.org/>) to match the orientation and slice  
104 thickness of each patient's T2-weighted image[6, 17-19], and 3D printed using a fifth-generation  
105 Makerbot (Makerbot Industries, Brooklyn, NY). The MRI scans were not used beyond slicing  
106 molds for the remainder of this study.

107

108 Whole-mount tissue sections were processed, paraffin embedded, and resulting whole mount slides  
109 were hematoxylin and eosin (H&E) stained. The slides were then digitally scanned using a slide  
110 scanner (Olympus America Inc., Center Valley, PA, USA) at a resolution of 0.34 microns per pixel  
111 (40x magnification) to produce whole slide images (WSI), and down-sampled by a factor of 8 to  
112 decrease processing time. A total of 330 digitized slides were manually annotated using a  
113 Microsoft Surface Pro 4 (Microsoft, Seattle, WA, USA) with a pre-loaded color palette for  
114 different Gleason patterns[2] by a GU fellowship-trained pathologist (KAI). An example of the  
115 prostate annotation process is shown in **Figure 1**.

116

117 **Fig 1.** *Top:* Annotation and tile extraction process. After manual annotation of digitized slides,  
118 3000x3000 pixel tiles are extracted from unique annotated regions. Those tiles are then further  
119 divided into 1024x1024 pixel tiles and those that remain within a mask are saved (black tiles  
120 indicate unsaved tiles). *Middle:* Workflow for the ATARI classifier. Quantitative pathomic  
121 features calculated from the large tiles are used as input to a compact classification ensemble to  
122 predict cancer vs non-cancer in a whole-slide image. *Bottom:* Workflow for the ResNet101  
123 classifier. 1024x1024 pixel annotated tiles are used as input into the ResNet model to predict non-

124 cancer vs Gleason grade groups. *Abbreviations:* HGPIN = high-grade prostatic intraepithelial  
125 neoplasia; G3 = Gleason pattern 3; G4CG = Gleason pattern 4 cribriform; G4NC = Gleason pattern  
126 4 non-cribriform; G5 = Gleason pattern 5.

127

### 128 Annotation Segmentation

129 Digital whole-mount slides were divided into high resolution tiles that were 3000x3000 pixels and  
130 labeled using their corresponding xy-coordinates within the image. This size tile was chosen as it  
131 is the smallest resolution that our pathologist could determine Gleason grades. These tiles were  
132 then stitched back together to recreate the whole-mount image while concurrently creating x- and  
133 y-coordinate look-up tables. A subset of slides was rescanned on the Olympus slide scanner, and  
134 annotations that were performed on lower resolution digitized versions of the slide were  
135 quantitatively transferred (n=201 slides). Briefly, the analogous annotated image was aligned to  
136 the newly digitized slide using MATLAB 2021b's *imregister* function (The MathWorks Inc.,  
137 Natick, MA, USA). The annotations were isolated to create a single mask for each of eight possible  
138 classes: seminal vesicles, atrophy, high-grade prostatic intraepithelial neoplasia (HGPIN), Gleason  
139 3 (G3), Gleason 4 cribriform gland (G4CG), Gleason 4 non-cribriform glands (G4NC), Gleason 5  
140 (G5), and unlabeled benign tissue. Gleason 4 patterns have been separated in our annotations as  
141 there are notable prognostic differences between the cribriform and non-cribriform patterns[20-  
142 23]. An additional averaged white image of non-tissue (i.e., background, lumen, and other  
143 artifacts) was found to remove these areas from the annotation masks to ensure the most  
144 representative histology remained for analysis. Each region of interest (ROI) within an individual  
145 class was individually compared to the xy-look-up tables to determine coordinates corresponding  
146 to tiles, and only those with over 50% of a specific annotation were included. Five tiles from each

147 ROI were saved into annotation-specific directories for use with the ATARI model, except for  
 148 unlabeled benign tissue where 15 tiles were randomly saved from each slide. ROIs that were too  
 149 small to extract 5 tiles from were excluded.

150

151 Each annotated tile was further divided into 1024x1024 pixel tiles for use with the ResNet101  
 152 model, resulting in upwards of 9 sub-tiles used for the ResNet101 per full-sized tile used for the  
 153 ATARI model. Sub-tiles that remained within a mask were saved into annotation-specific  
 154 directories, similarly to the large tiles used for the ATARI model. The ResNet101 additionally  
 155 was trained using background tiles determined by areas that were included in the average white  
 156 image. Tiles used for training were augmented by resizing (250x250 pixel), random cropping  
 157 (240x240), applying color jitter (0.3, 0.3, 0.3), adding random rotations ( $\pm 0-30^\circ$ ), applying  
 158 random horizontal and vertical flips and center cropping to the ResNet input size of 224x224 as  
 159 well as normalizing to ImageNet's mean (0.485, 0.456, 0.406) and standard deviation (0.229,  
 160 0.224, 0.225). This tile extraction process is demonstrated in **Figure 1**, and breakdown of slides  
 161 and sorted tiles can be found in **Table 2**.

162

163 **Table 2.** Breakdown of tiles used for training and testing each of the models.

|                                | <b>Training</b> |            | <b>Testing</b> |            |
|--------------------------------|-----------------|------------|----------------|------------|
|                                | (n = 31)        |            | (n = 16)       |            |
| Tissue samples (n, %)          | 213             |            | 117            |            |
| Samples per patient (mean, SD) | 6.9 (2.3)       |            | 7.3 (1.9)      |            |
| Annotated Tiles (n, %)         | ATARI           | ResNet101  | ATARI          | ResNet101  |
| Atrophy                        | 3555 (38)       | 30000 (24) | 1675 (38)      | 72098 (57) |



|                         |           |            |           |            |
|-------------------------|-----------|------------|-----------|------------|
| G3                      | 990 (11)  | 16000 (13) | 475 (11)  | 14565 (11) |
| G4CG                    | 130 (1)   | 5477 (4)   | 60 (1)    | 1078 (1)   |
| G4NC                    | 515 (6)   | 16482 (13) | 235 (5)   | 5382 (4)   |
| G5                      | 75 (1)    | 4118 (3)   | 55 (1)    | 236 (<1)   |
| HGPIN                   | 285 (86)  | 4785 (4)   | 45 (1)    | 610 (<1)   |
| Seminal Vesicles        | 435 (67)  | 10456 (8)  | 210 (5)   | 5728 (5)   |
| Unlabeled Benign Tissue | 3360 (67) | 20000 (16) | 1620 (37) | 13483 (11) |
| Background              | 0 (0)     | 20000 (16) | 0 (0)     | 14027 (11) |
| Total                   | 9345      | 127319     | 4375 (32) | 127207     |

164

#### 165 Pathomic Feature Extraction

166 High resolution tiles were down-sampled to increase processing time, and then were processed  
167 using a custom, in-house MATLAB function to extract pathological features for use with the  
168 ATARI model. First, a color deconvolution algorithm was applied to each image to segment  
169 stroma, epithelium, and lumen based on their corresponding stain optical densities (i.e., positive  
170 hematoxylin or eosin, and background)[24]. These features were then further smoothed and  
171 filtered to remove excess noise and improve segmentations. Glands with lumen touching the edge  
172 of a tile were excluded. Overall stromal and epithelial areas were calculated on a whole-image  
173 basis, and an additional six features were calculated on an individual gland-basis: epithelial area,  
174 roundness, and wall thickness; luminal area and roundness, and cell fraction (i.e., the percent of  
175 epithelial cells per total gland area, defined by the area of the epithelium without lumen).

176

#### 177 Model training

178 Flowcharts for the ATARI model and ResNet101 classifier can be found in **Figure 1**. An ensemble  
179 algorithm was used as the framework for developing the ATARI classifier on 31 subjects based in  
180 MATLAB (Mathworks, Inc. Natick, MA). A compact classification ensemble was used, which  
181 fitted predictors trained on bootstrapped samples from the training data set to obtain a combined  
182 ensemble model that minimized variance across learners[25, 26]. Inputs for this model were mean,  
183 median, and variance of the calculated pathomic features averaged across each tile, z-scored across  
184 the training data. To test the granularity of Gleason pattern prediction, we trained predictive  
185 models using several different levels of tumor specificity including all Gleason grades; high- (G4+)  
186 and low-grade (G3) cancer and benign tissue (HG vs LG model); and non-cancer and cancer (G3+)  
187 (NC vs CA model). To test generalizability, the model was applied to a left-out test set. Predictions  
188 were then plotted on three slides from the test data set using the same features calculated across  
189 all tiles for the slide to assess successful identification of tumor and compared to ground-truth  
190 pathologist annotations and the ResNet model.

191  
192 To test a deep learning approach for comparison, a ResNet model with 101 layers was implemented  
193 in Python using the PyTorch framework (v.1.8.1)[12, 27]. The same tiling procedure as previously  
194 described was used to curate the dataset for this network, with the addition of splitting all tiles into  
195 smaller 1024x1024 pixel patches and saving those that remained 50% within an annotation mask.  
196 Data from Cohort A was split into 80/20 training and validation datasets to prevent overfitting and  
197 several data augmentation techniques were used to increase training samples. The image patches  
198 were resized to 250x250 pixels, randomly cropped to 240x240 pixels, augmented and center  
199 cropped to generate the needed input size of 224x224 pixels. The same three model designs as the

200 ATARI were trained using the ResNet101 framework. Class imbalance of the training dataset was  
201 addressed by introducing sample number-based class weights in the cross-entropy loss function.

202

## 203 **Results**

204 The accuracy of both models was analyzed using a left-out test dataset from 17 patients (95,875  
205 image patches for the ResNet; 4,375 image tiles for ATARI). The ATARI model was unable to  
206 successfully classify Gleason grades (overall accuracy 85%, per-class accuracy range 0% - 99%)  
207 nor high- (HG) and low-grade (LG) cancer (overall accuracy 83%, per-class accuracy range <1%  
208 - 99%). In both models, normal tissue was classified well above chance level (20% for all Gleason  
209 grades, 33% for high- and low-grade cancer), with G3 in the Gleason grades model and HG in the  
210 HG vs LG model performing at chance. The non-cancer (NC) vs cancer (CA) model had an overall  
211 accuracy of 89% and a per class accuracy of 97% and 53% for NC and CA, respectively. The  
212 ResNet model was able to successfully classify all Gleason grades with an absolute overall  
213 accuracy of 79% (per class accuracy range 25% - 87%), HG vs LG (overall accuracy 72%, per  
214 class accuracy range 55% - 72%), and NC vs CA (overall accuracy 83%) with an accuracy 91%  
215 and 74% for non-cancer and cancer (**Figure 2**).

216

217 **Fig 2.** Confusion matrices for the three classification models for both the ResNet101 and ATARI.  
218 The ResNet101 was able to distinguish between unique Gleason patterns at higher accuracies than  
219 the corresponding ATARI models.

220

221 **Figure 3** show the representative slides as their ATARI and ResNet101 annotations as compared  
222 to ground-truth annotations. Although the ATARI model was unable to capture unique Gleason

223 patterns, it was able to define the region of tumor present on the slide. The ResNet101 model was  
224 able to accurately predict the Gleason patterns with a per class accuracy of 25-52%.

225

226 **Fig 3.** Ground truth annotation maps compared to the ResNet101 model for all Gleason grades and  
227 the three tested ATARI models: all Gleason grades, high- vs low-grade cancer, and cancer vs non-  
228 cancer only. ResNet101 model for all Gleason grades and the three ATARI models: all Gleason  
229 grades, high- vs low-grade cancer, and cancer vs non-cancer only.

230

### 231 **Discussion**

232 In this study, high-resolution tiles taken from annotated regions on whole-mount digital slides after  
233 radical prostatectomy were used to train models to support pathologist diagnoses of prostate  
234 cancer. Specifically, the ATARI model used quantitative features to classify glandular features,  
235 whereas the ResNet101 classifier used deeper textural features of histology. The ATARI was only  
236 able to accurately predict cancer and non-cancer, whereas the ResNet101 classifier was able to  
237 further predict unique Gleason grades present on the slide. The results from our study indicate that  
238 while machine learning models using calculated features may be successful at differentiating  
239 tumor from non-tumor, deeper features found using neural networks can further define unique  
240 patterns. This may indicate that Gleason patterns exist beyond simple glandular features and may  
241 be more readably quantified using textural features. The absolute accuracies of 89% and 83% for  
242 the ATARI and ResNet101 models, respectively, show the need for a more general approach to  
243 using machine learning for cancer diagnosis.

244

245 Machine and deep learning applications are becoming prominent in clinical research. Machine  
246 learning focuses on the use of data and algorithms to imitate the way that humans learn. Data used  
247 in machine learning applications are human-derived, quantitative metrics that are then analyzed  
248 through statistical methods to make classifications or predictions. Deep learning is a sub-field of  
249 machine learning that automates the feature extraction without the need for human intervention. It  
250 can uncover more nuanced patterns within the data to generate predictions. In this study, our  
251 proposed machine-learning model outperformed the ResNet model at classifying cancer from non-  
252 cancer; however, the ResNet could classify unique Gleason grades. This may indicate that the  
253 features of Gleason grades do not have strong quantitative differences, but rather texture  
254 differences that are discernible using a deep learning model. Other prior studies have shown similar  
255 results where a trained deep learning model outperformed a simple model trained on handcrafted  
256 features[28-30].

257  
258 Automated Gleason grading applications have been previously applied for multiple purposes. One  
259 prior study trained a convolutional neural network (CNN) using WSI-level features constructed  
260 from a CNN-based PCa detection model that was trained from slide-level annotations to predict  
261 the final patient Gleason Grade Group[31]. This model achieved a 94.7% accuracy at detecting  
262 cancer and 77.5% accuracy at predicting the patient Grade Group. While promising, this model  
263 does not provide histological annotations to WSI, but rather only predict patient Grade Group.  
264 Several previous studies have applied deep learning models to prostate biopsy specimens[11, 32,  
265 33]. While these models have achieved high accuracies at annotating biopsy cores, our ResNet101  
266 model was able to annotate whole-slides images and could distinguish between regions of Gleason  
267 4 cribriform and non-cribriform tumors.

268

269 Integrating rapid annotation of Gleason patterns after tissue resection into the clinical workflow  
270 could save a tremendous amount of pathologist time. Once slides are digitally scanned, a diagnosis  
271 could be predicted automatically based on the automated annotations. This could then be used to  
272 rank slides by order of importance for pathologist review and to aid in treatment planning. The  
273 proposed models could be applied to large data sets and would decrease the workload on  
274 pathologists. Additionally, annotations provided from quantitative metrics may eliminate  
275 variability in Gleason annotations.

276

277 One major limitation of the study is the use of only one pathologist for annotating the training and  
278 test datasets. Inter-observer variability is a known issue in prostate cancer diagnosis, and thus  
279 should be addressed in the training phase. Additionally, only one slide scanner was used to digitize  
280 the slides used in this study. Future studies should investigate the impact additional slide scanners  
281 would have on the generalizability of the models, as this analysis was outside the scope of the  
282 current study. Finally, future studies should look at larger populations to provide a more robust  
283 dataset of Gleason patterns which may increase accuracy in the machine learning models, as this  
284 study had a relatively small cohort of 47 patients.

285

## 286 **Conclusion**

287 We demonstrate in a cohort of 47 patients that machine learning models and neural networks can  
288 accurately predict regions of prostate cancer, where the latter network was further able to classify  
289 unique Gleason patterns. These models are anticipated to aid in prostate cancer decision support

290 by decreasing the diagnostic burden of pathologists. Future studies should determine how inter-  
291 observer and slide scanner resolution impact these networks in their classifications.

292

293 **Acknowledgments:** We would like to thank our patients for their participation in this study, and  
294 the Medical College of Wisconsin Machine Learning Group for helpful feedback and discussion.

295 **Author Contributions:** Conceptualization, S.R.D. and P.S.L.; methodology, A.N., K.A.I. and  
296 P.S.L.; software, S.R.D., S.A.B., A.K.L., M.B., A.W., and F.K.; validation, S.R.D., S.A.B.,  
297 A.K.L., M.B., A.W., F.K., and P.S.L.; formal analysis, S.R.D.; investigation, P.S.L.; resources,  
298 P.S.L.; data curation, P.S.L.; writing—original draft preparation, S.R.D.; writing—review and  
299 editing, S.R.D., S.A.B., A.K.L., M.B., A.W., F.K., K.A.I., A.N., and P.S.L.; visualization, S.R.D.;  
300 supervision, P.S.L.; project administration, P.S.L.; funding acquisition, P.S.L. All authors have  
301 read and agreed to the published version of the manuscript.

302

303

304

305 **References**

- 306 1. Siegel RL, Miller KD, Fuchs HE, Jemal A. Cancer Statistics, 2022. CA: A Cancer Journal for  
307 Clinicians. 2022;72(1):7-33. doi: 10.3322/caac.21708.
- 308 2. Epstein JI, Zelefsky MJ, Sjoberg DD, Nelson JB, Egevad L, Magi-Galluzzi C, et al. A  
309 Contemporary Prostate Cancer Grading System: A Validated Alternative to the Gleason  
310 Score. European Urology. 2016;69(3). doi: 10.1016/j.eururo.2015.06.046.
- 311 3. Loeb S, Bjurlin MA, Nicholson J, Tammela TL, Penson DF, Carter HB, et al. Overdiagnosis  
312 and overtreatment of prostate cancer. Eur Urol. 2014;65(6):1046-55. doi:  
313 10.1016/j.eururo.2013.12.062.
- 314 4. Madabhushi A. Digital pathology image analysis: opportunities and challenges. Imaging Med.  
315 2009;1(1):7-10. doi: 10.2217/IIM.09.9.
- 316 5. Niazi MKK, Parwani AV, Gurcan MN. Digital pathology and artificial intelligence. Lancet  
317 Oncol. 2019;20(5):e253-e61. doi: 10.1016/S1470-2045(19)30154-8.
- 318 6. McGarry SD, Bukowy JD, Iczkowski KA, Lowman AK, Brehler M, Bobholz S, et al. Radio-  
319 pathomic mapping model generated using annotations from five pathologists reliably  
320 distinguishes high-grade prostate cancer. Journal of Medical Imaging. 2020;7(05). doi:  
321 10.1117/1.jmi.7.5.054501.
- 322 7. Ozkan TA, Eruyar AT, Cebeci OO, Memik O, Ozcan L, Kuskonmaz I. Interobserver  
323 variability in Gleason histological grading of prostate cancer. Scandinavian Journal of  
324 Urology. 2016;50(6). doi: 10.1080/21681805.2016.1206619.
- 325 8. Arvaniti E, Fricker KS, Moret M, Rupp N, Hermanns T, Fankhauser C, et al. Automated  
326 Gleason grading of prostate cancer tissue microarrays via deep learning. Sci Rep.  
327 2018;8(1):12054. doi: 10.1038/s41598-018-30535-1.



- 328 9. Bulten W, Pinckaers H, van Boven H, Vink R, de Bel T, van Ginneken B, et al. Automated  
329 deep-learning system for Gleason grading of prostate cancer using biopsies: a diagnostic  
330 study. *The Lancet Oncology*. 2020;21(2). doi: 10.1016/S1470-2045(19)30739-9.
- 331 10. Lokhande A, Bonthu S, Singhal N. Carcino-Net: A Deep Learning Framework for  
332 Automated Gleason Grading of Prostate Biopsies. *Annu Int Conf IEEE Eng Med Biol Soc*.  
333 2020;2020:1380-3. doi: 10.1109/EMBC44109.2020.9176235.
- 334 11. Ryu HS, Jin MS, Park JH, Lee S, Cho J, Oh S, et al. Automated Gleason Scoring and Tumor  
335 Quantification in Prostate Core Needle Biopsy Images Using Deep Neural Networks and Its  
336 Comparison with Pathologist-Based Assessment. *Cancers (Basel)*. 2019;11(12). doi:  
337 10.3390/cancers11121860.
- 338 12. Brehler M, Lowman AK, Bobholz SA, Duenweg SR, Kyereme F, Naze C, et al. An  
339 automated approach for annotation Gleason patterns in whole-mount prostate cancer histology  
340 using deep learning. *SPIE*. San Diego, California2022.
- 341 13. Menon M, Hemal AK. Vattikuti Institute prostatectomy: A technique of robotic radical  
342 prostatectomy: Experience in more than 1000 cases. *Journal of Endourology*. 2004;18(7). doi:  
343 10.1089/end.2004.18.611.
- 344 14. Sood A, Jeong W, Peabody JO, Hemal AK, Menon M. Robot-Assisted Radical  
345 Prostatectomy: Inching Toward Gold Standard. *Urologic Clinics of North America*2014.
- 346 15. Shah V, Pohida T, Turkbey B, Mani H, Merino M, Pinto PA, et al. A method for correlating  
347 in vivo prostate magnetic resonance imaging and histopathology using individualized  
348 magnetic resonance -based molds. *Review of Scientific Instruments*. 2009;80(10). doi:  
349 10.1063/1.3242697.

- 350 16. Cox RW. AFNI: Software for analysis and visualization of functional magnetic resonance  
351 neuroimages. *Computers and Biomedical Research*. 1996;29(3). doi:  
352 10.1006/cbmr.1996.0014.
- 353 17. Hurrell SL, McGarry SD, Kaczmarowski A, Iczkowski KA, Jacobsohn K, Hohenwalter MD,  
354 et al. Optimized b-value selection for the discrimination of prostate cancer grades, including  
355 the cribriform pattern, using diffusion weighted imaging. *Journal of Medical Imaging*.  
356 2017;5(01). doi: 10.1117/1.jmi.5.1.011004.
- 357 18. McGarry SD, Hurrell SL, Iczkowski KA, Hall W, Kaczmarowski AL, Banerjee A, et al.  
358 Radio-pathomic Maps of Epithelium and Lumen Density Predict the Location of High-Grade  
359 Prostate Cancer. *International Journal of Radiation Oncology Biology Physics*. 2018;101(5).  
360 doi: 10.1016/j.ijrobp.2018.04.044.
- 361 19. McGarry SD, Bukowy JD, Iczkowski KA, Unteriner JG, Duvnjak P, Lowman AK, et al.  
362 Gleason probability maps: A radiomics tool for mapping prostate cancer likelihood in mri  
363 space. *Tomography*. 2019;5(1). doi: 10.18383/j.tom.2018.00033.
- 364 20. Iczkowski KA, Torkko KC, Kotnis GR, Wilson RS, Huang W, Wheeler TM, et al. Digital  
365 quantification of five high-grade prostate cancer patterns, including the cribriform pattern, and  
366 their association with adverse outcome. *American Journal of Clinical Pathology*. 2011;136(1).  
367 doi: 10.1309/AJCPZ7WBU9YXSJPE.
- 368 21. Iczkowski KA, Paner GP, Van der Kwast T. The New Realization About Cribriform Prostate  
369 Cancer. *Adv Anat Pathol*. 2018;25(1):31-7. doi: 10.1097/PAP.000000000000168.
- 370 22. Kweldam CF, Wildhagen MF, Steyerberg EW, Bangma CH, Van Der Kwast TH, Van  
371 Leenders GJLH. Cribriform growth is highly predictive for postoperative metastasis and

- 372 disease-specific death in Gleason score 7 prostate cancer. *Modern Pathology*. 2015;28(3). doi:  
373 10.1038/modpathol.2014.116.
- 374 23. van der Slot MA, Hollemans E, den Bakker MA, Hoedemaeker R, Kliffen M, Budel LM, et  
375 al. Inter-observer variability of cribriform architecture and percent Gleason pattern 4 in  
376 prostate cancer: relation to clinical outcome. *Virchows Archiv*. 2021;478(2). doi:  
377 10.1007/s00428-020-02902-9.
- 378 24. Ruifrok AC, Johnston DA. Quantification of histochemical staining by color deconvolution.  
379 *Anal Quant Cytol Histol*. 2001;23(4):291-9.
- 380 25. Breiman L. Bagging predictors. *Machine Learning*. 1996;24.
- 381 26. Breiman L. Random Forests. *Machine Learning*. 2001;45.
- 382 27. Paszke A, Lerer A, Killeen T, Antiga L, Yang E, Tejani A, et al. PyTorch: An Imperative  
383 Style, High-Performance Deep Learning Library. *Advances in Neural Information Processing*  
384 *Systems*. 2019;32.
- 385 28. Arunachalam HB, Mishra R, Daescu O, Cederberg K, Rakheja D, Sengupta A, et al. Viable  
386 and necrotic tumor assessment from whole slide images of osteosarcoma using machine-  
387 learning and deep-learning models. *PLoS One*. 2019;14(4):e0210706. doi:  
388 10.1371/journal.pone.0210706.
- 389 29. Sharma S, Mehra R. Conventional Machine Learning and Deep Learning Approach for  
390 Multi-Classification of Breast Cancer Histopathology Images—a Comparative Insight.  
391 *Journal of Digital Imaging*. 2020;33:632-54. doi: <https://doi.org/10.1007/s10278-019-00307->  
392 y.

- 393 30. Xu J, Luo X, Wang G, Gilmore H, Madabhushi A. A Deep Convolutional Neural Network  
394 for segmenting and classifying epithelial and stromal regions in histopathological images.  
395 *Neurocomputing*. 2016;191:214-23. doi: 10.1016/j.neucom.2016.01.034.
- 396 31. Mun Y, Paik I, Shin SJ, Kwak TY, Chang H. Yet Another Automated Gleason Grading  
397 System (YAAGGS) by weakly supervised deep learning. *NPJ Digit Med*. 2021;4(1):99. doi:  
398 10.1038/s41746-021-00469-6.
- 399 32. Lucas M, Jansen I, Savci-Heijink CD, Meijer SL, de Boer OJ, van Leeuwen TG, et al. Deep  
400 learning for automatic Gleason pattern classification for grade group determination of prostate  
401 biopsies. *Virchows Arch*. 2019;475(1):77-83. doi: 10.1007/s00428-019-02577-x.
- 402 33. Nagpal K, Foote D, Tan F, Liu Y, Chen PC, Steiner DF, et al. Development and Validation  
403 of a Deep Learning Algorithm for Gleason Grading of Prostate Cancer From Biopsy  
404 Specimens. *JAMA Oncol*. 2020;6(9):1372-80. doi: 10.1001/jamaoncol.2020.2485.  
405  
406  
407

# Pathologist Annotations

# Atrophy

# HGPIN

# G3

# G4CG

# G4NC

# G5

bioRxiv preprint doi: <https://doi.org/10.1101/2022.11.10.516007>; this version posted November 14, 2022. The copyright holder for this preprint (which was not certified by peer review) is the author/funder, who has granted bioRxiv a license to display the preprint in perpetuity. It is made available under aCC-BY 4.0 International license.

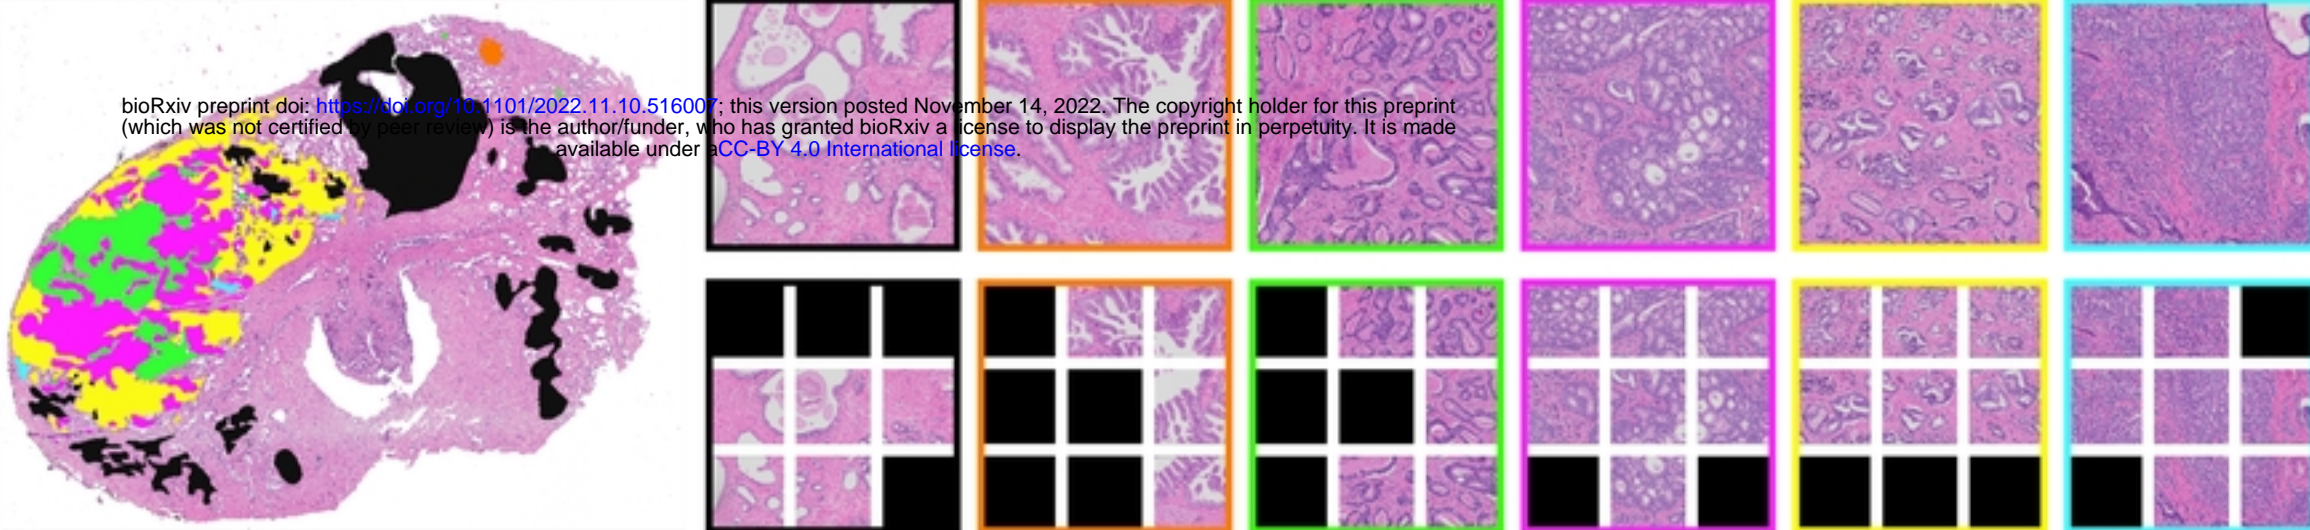

## ATARI

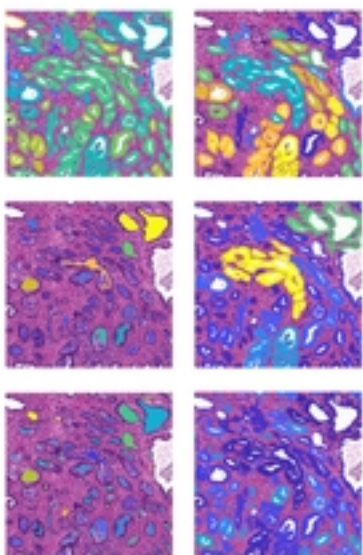

| Property              | Value                                          |
|-----------------------|------------------------------------------------|
| <b>ClassNames</b>     | Cancer, Non-cancer                             |
| <b>CombineWeights</b> | WeightedSum                                    |
| <b>Cost</b>           | $\begin{bmatrix} 0 & 1 \\ 1 & 0 \end{bmatrix}$ |
| <b>PredictorNames</b> | 1x24                                           |
| <b>ScoreTransform</b> | None                                           |
| <b>Trained</b>        | 407x1                                          |

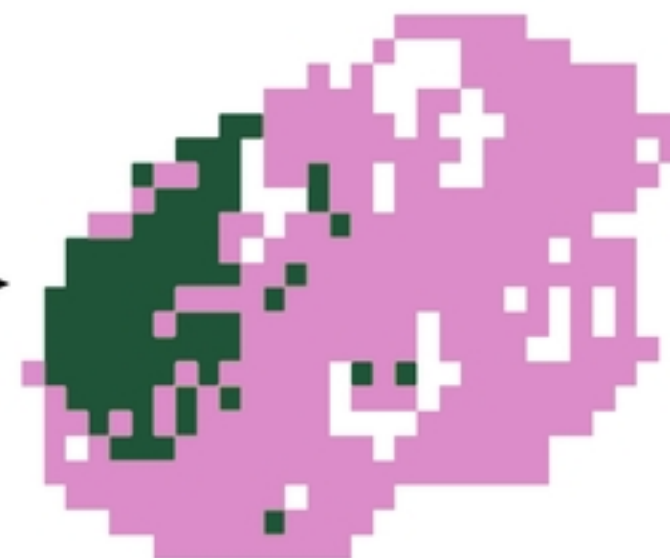

## ResNet101

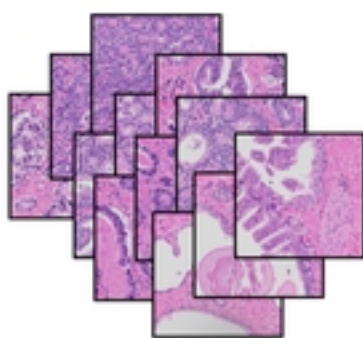

| Layer name     | Output size | 101-layer                                                                |
|----------------|-------------|--------------------------------------------------------------------------|
| <b>Conv1</b>   | 112x112     | 7x7, 64, stride 2                                                        |
|                |             | 3x3 max pool, stride 2                                                   |
| <b>Conv2_x</b> | 56x56       | $\begin{bmatrix} 1x1 & 64 \\ 3x3 & 64 \\ 1x1 & 256 \end{bmatrix}$ x3     |
| <b>Conv3_x</b> | 28x28       | $\begin{bmatrix} 1x1 & 128 \\ 3x3 & 128 \\ 1x1 & 512 \end{bmatrix}$ x4   |
| <b>Conv4_x</b> | 14x14       | $\begin{bmatrix} 1x1 & 256 \\ 3x3 & 256 \\ 1x1 & 1024 \end{bmatrix}$ x23 |
| <b>Conv5_x</b> | 7x7         | $\begin{bmatrix} 1x1 & 512 \\ 3x3 & 512 \\ 1x1 & 2048 \end{bmatrix}$ x3  |
|                | 1x1         | Average pool, 1000-d fc, softmax                                         |

**Hyperparameters**

- 1000 epochs
- 0.001 initial LR
- Reduce LR on plateau

Fine tuning

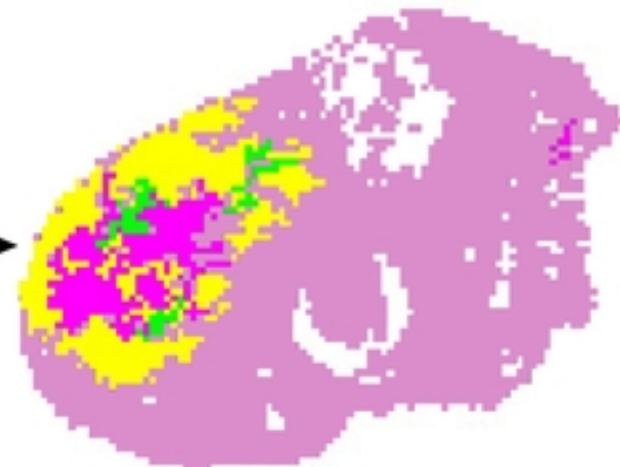

Figure 1

ResNet101

All Grades

|      |     |      |      |     |     |
|------|-----|------|------|-----|-----|
| G3   | 52% | 3%   | 16%  | 2%  | 27% |
| G4CG | 16% | 44%  | 23%  | 1%  | 16% |
| G4NC | 32% | 10%  | 25%  | 8%  | 25% |
| G5   | 8%  | 6%   | 22%  | 45% | 19% |
| NC   | 7%  | 2%   | 1%   | 0%  | 87% |
|      | G3  | G4CG | G4NC | G5  | NC  |

HG vs LG

|    |     |     |     |
|----|-----|-----|-----|
| HG | 55% | 26% | 11% |
| LG | 13% | 65% | 14% |
| NC | 2%  | 8%  | 72% |
|    | HG  | LG  | NC  |

NC vs CA

|    |     |     |
|----|-----|-----|
| NC | 92% | 8%  |
| CA | 26% | 74% |
|    | NC  | CA  |

ATARI

All Grades

|      |     |      |      |    |     |
|------|-----|------|------|----|-----|
| G3   | 21% | 0%   | <1%  | 0% | 79% |
| G4CG | 16% | 0%   | <1%  | 0% | 82% |
| G4NC | 21% | 0%   | 6%   | 0% | 73% |
| G5   | 9%  | 0%   | 8%   | 0% | 82% |
| NC   | <1% | <1%  | <1%  | 0% | 99% |
|      | G3  | G4CG | G4NC | G5 | NC  |

HG vs LG

|    |     |     |     |
|----|-----|-----|-----|
| HG | 33% | 9%  | 58% |
| LG | 9%  | 21% | 70% |
| NC | <1% | <1% | 99% |
|    | HG  | LG  | NC  |

NC vs CA

|    |     |     |
|----|-----|-----|
| NC | 97% | 3%  |
| CA | 47% | 53% |
|    | NC  | CA  |

Figure 2

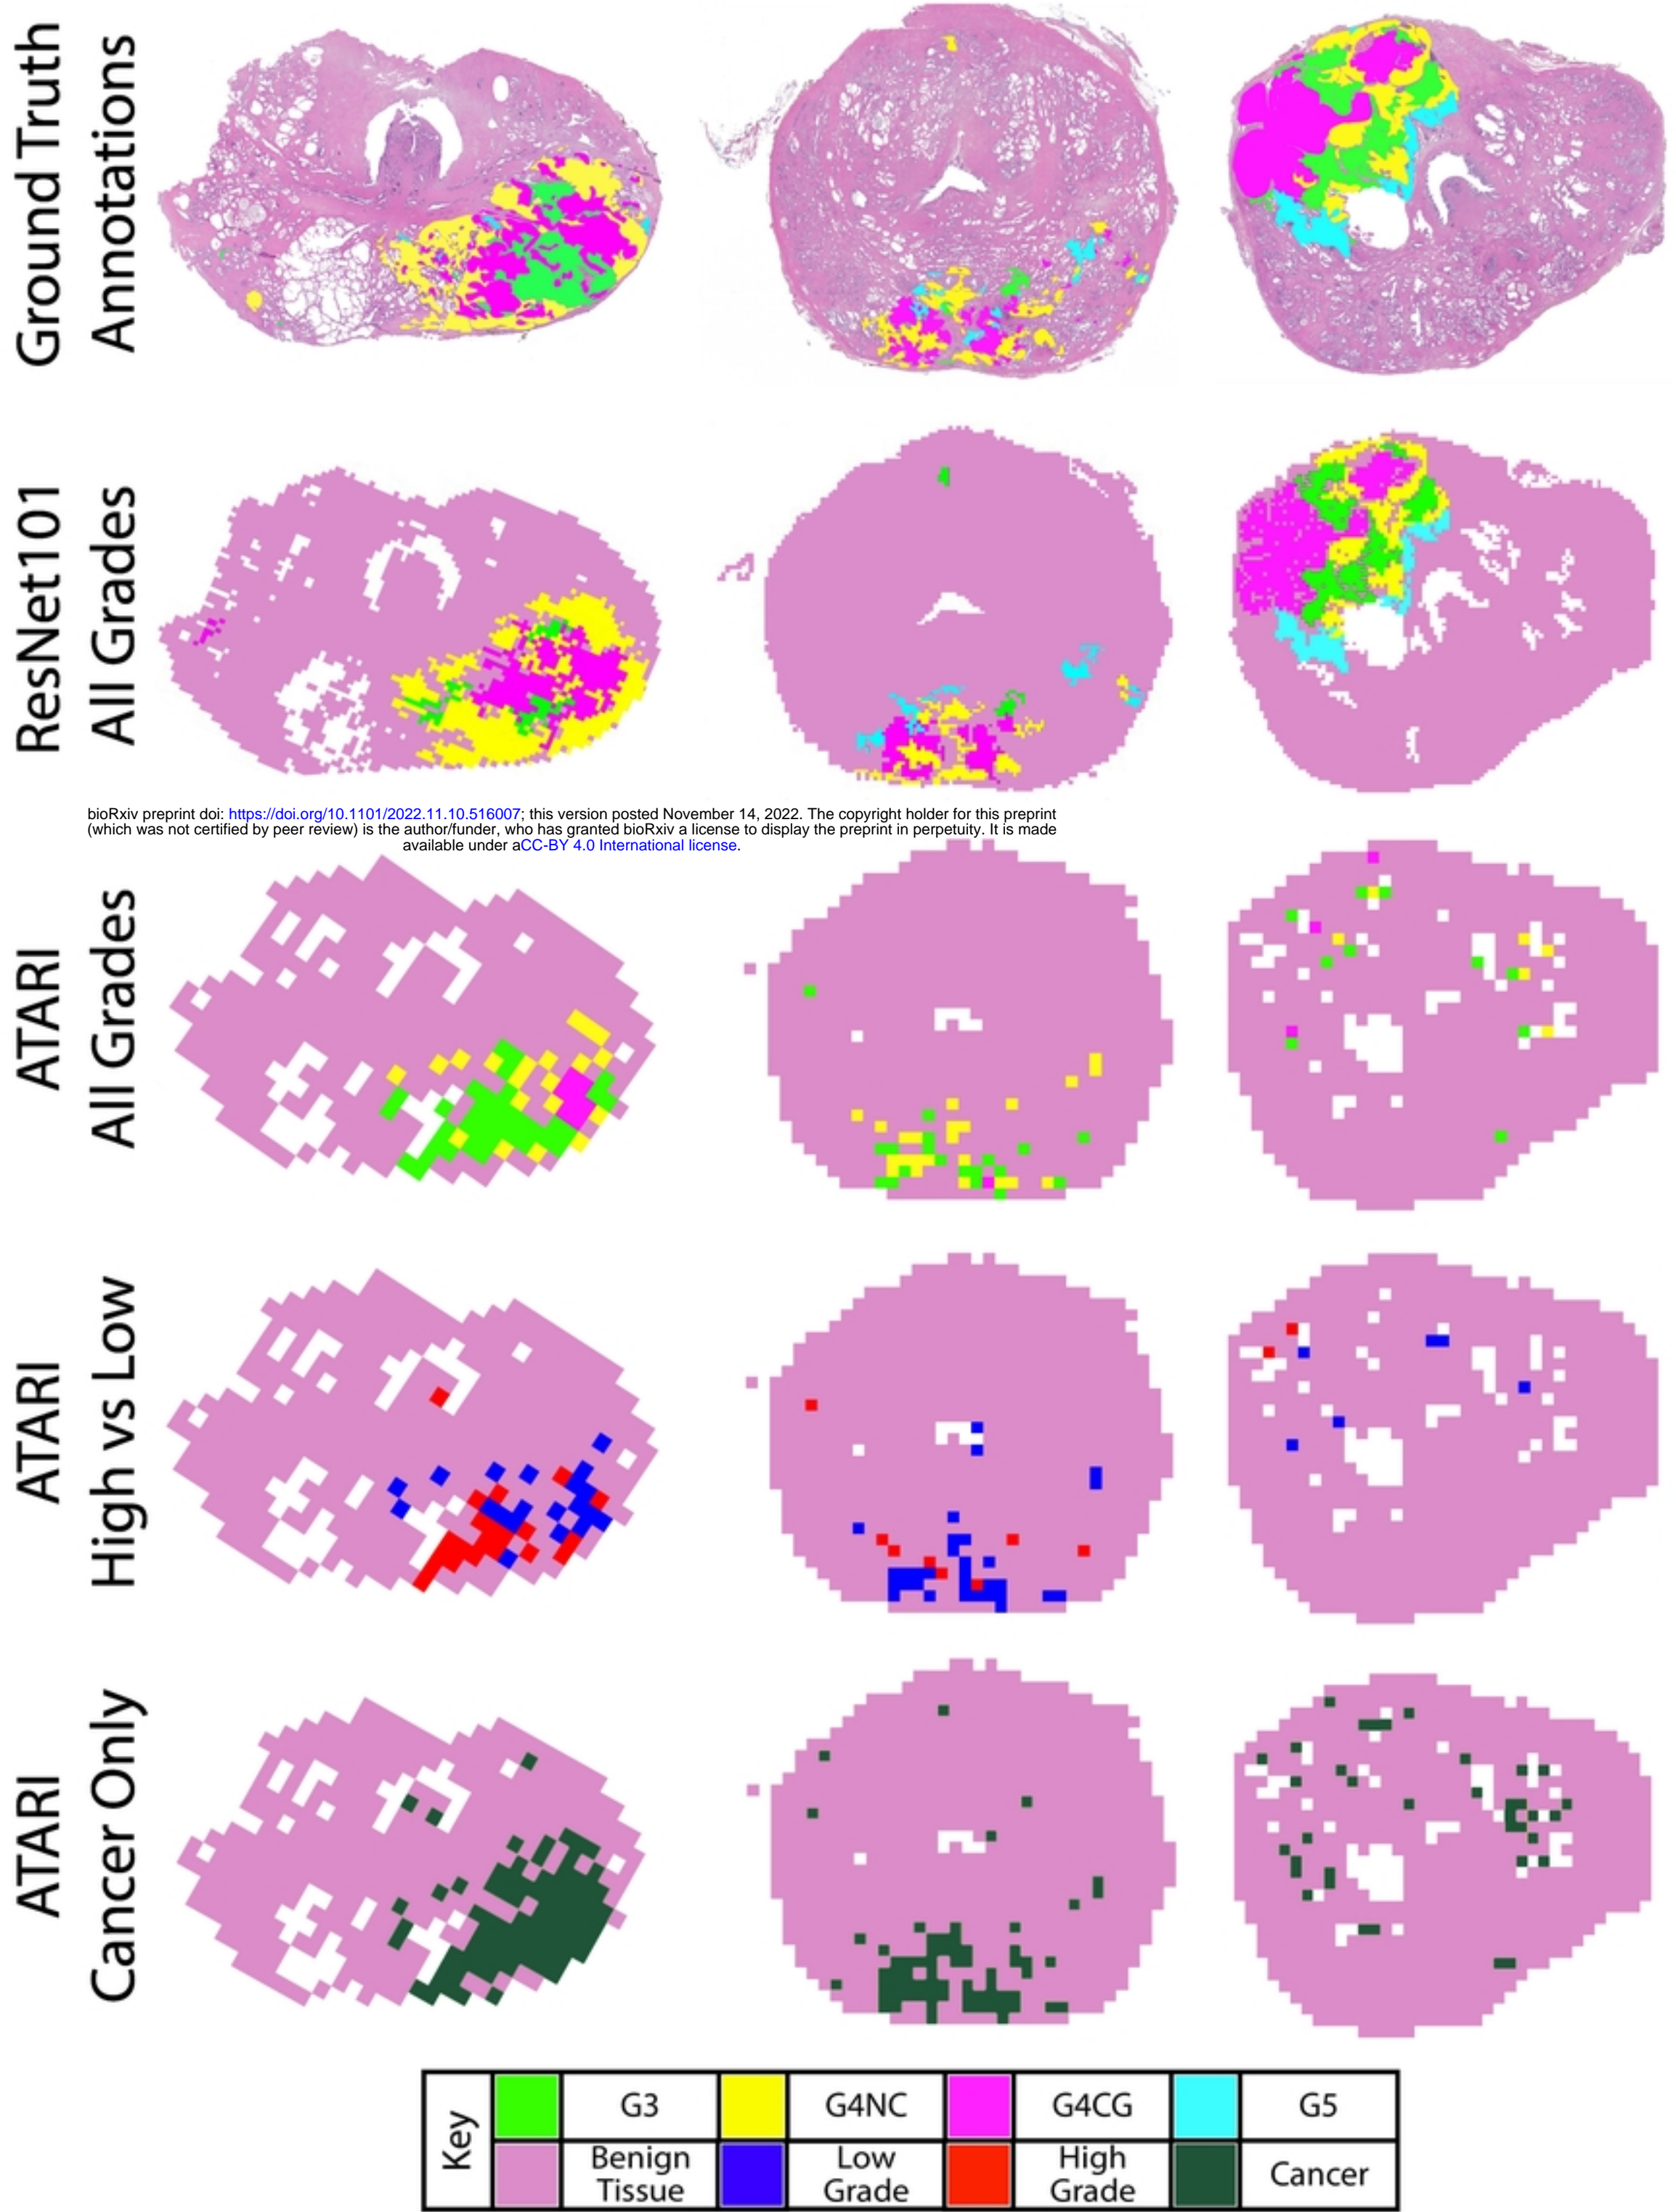

Figure 3
